# Supplementary material for: One-pot synthesis of multicomponent (Mo, Co) metal sulfide/carbon nanoboxes as anode materials for improving Na-ion storage
Source: Royal Society of Chemistry journal article supplement (doi:10.1039/c7cc06192g), 2017-01-01
Supplement: c7cc06192g1.pdf [file c7cc06192g1.pdf]

# One-Pot Synthesis of Multicomponent (Mo, Co) Metal Sulfide/Carbon Nanoboxes as anode materials for Improving Na-ion Storage

Juan Xiang,<sup>a</sup> and Taeseup Song<sup>a</sup>

<sup>a</sup> Department of Energy Engineering, Hanyang University, Seoul 133-791, South Korea.

E-mail: [tssong@hanyang.ac.kr](mailto:tssong@hanyang.ac.kr)

## Experimental Section

### Material preparation

*Preparation of ZIF-67 nanocrystals:* ZIF-67 was prepared according to a previously reported process.<sup>[1]</sup> In a typical synthesis procedure, 1 mmol cobalt nitrate hexahydrate and 4 mmol of 2-methylimidazole were added into 25.0 mL of methanol, respectively. After they were totally dissolved, the latter solution was added into the former under magnetic agitation for 1 min and then stood for 24 h. The purple solid was collected after centrifugation, washed with methanol for several times, and dried at room temperature.

*Synthesis of MoS<sub>2</sub>/Co<sub>9</sub>S<sub>8</sub>/C:* As-prepared ZIF-67 (50 mg) was dispersed into glucose solution (0.025 M) by sonication for 10 min, followed by the addition of Na<sub>2</sub>MoO<sub>4</sub>·2H<sub>2</sub>O (0.6 mmol) and thiourea (4 mmol). After 10-min stirring, the solution was transferred into a 50 mL Teflon-lined stainless steel autoclave and maintained at 200 °C for 24 h. After naturally cooling to room temperature, the black precipitate was collected by centrifugation, washed with ethanol and deionized water for several times, and vacuum-dried at 60 °C overnight. The as-prepared cobalt-molybdenum precursor (donated as CoMo-precursor) sample was further annealed at 500 °C in argon atmosphere for 4 h with a ramping rate of 2 °C min<sup>-1</sup> to obtain the highly crystalline sample. For comparison, pure Co<sub>9</sub>S<sub>8</sub> and MoS<sub>2</sub> samples were synthesized according to a similar route except the addition of Na<sub>2</sub>MoO<sub>4</sub>·2H<sub>2</sub>O and ZIF-67, respectively. To study the contribution of carbon sodium capacity, pure carbon was synthesized according to a similar route with glucose as starting material.

### Material Characterization

The samples were characterized by field-emission scanning electron microscope (FESEM; JEOLJSM07600F) and transmission electron microscope (TEM; JEOL JEM-2100F). Element mapping was analyzed by EDX attached to the TEM instrument. The chemical composition and surface valance states were analyzed with an X-ray photoelectron spectrometer (XPS, VG Microtech ESCA2000). XRD patterns of the products were explored by A Rigaku D/MAX RINT-2000 X-Ray Diffractometer (XRD) with Cu K $\alpha$  radiation at a voltage of 40 kV and a current of 40 mA. Thermogravimetric analysis (TGA) was performed with a ramp rate of 10 °C min<sup>-1</sup> in air atmosphere.

### Electrochemical measurements

The working electrode is made of active materials, conductivity agent (Carbon black), and binder (polyvinylidene fluoride) with a weight ratio of 8:1:1 and 1.0 M NaCF<sub>3</sub>SO<sub>3</sub> in diethylene glycol dimethyl ether with 5% fluoroethylene carbonate (FEC) additive was used as the electrolyte. The mass loading of the electrode was controlled to between 1.3- 1.8 mg. Sodium metal was used as both the reference electrode and counter electrode. In an argon-filled glove box, the coin-type half cells were assembled and then tested in TOSCAT 3000 battery tester (TOSCAT 3000, Toyo Systems, Tokyo, Japan) within a voltage range from 0.01 to 3.0 V. Cyclic voltammetry measurements were conducted on an Autolab potentiostat/galvanostat (PGSTAT-72637) electrochemical workstation. Electrochemical Impedance Spectroscopy (EIS) for each sample was taken within a frequency range of 1 MHz to 10 mHz and with a voltage amplitude  $\Delta V$ = 5 mV.

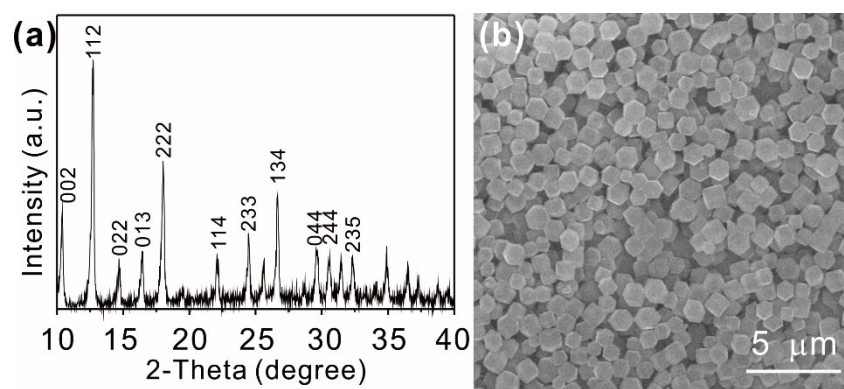

**Fig. S1** XRD pattern (a) and FESEM image (b) of ZIF 67 nanocrystals.

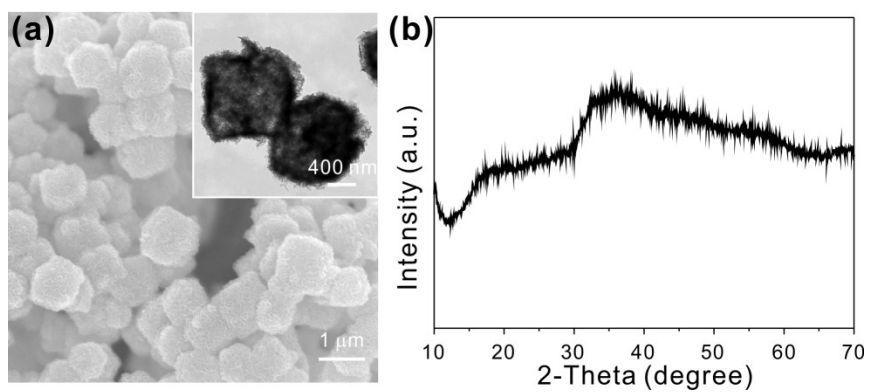

**Fig. S2** (a) SEM images of CoMo-precursor, inset in (a) is the TEM image of CoMo-precursor; (b) XRD pattern of CoMo-precursor.

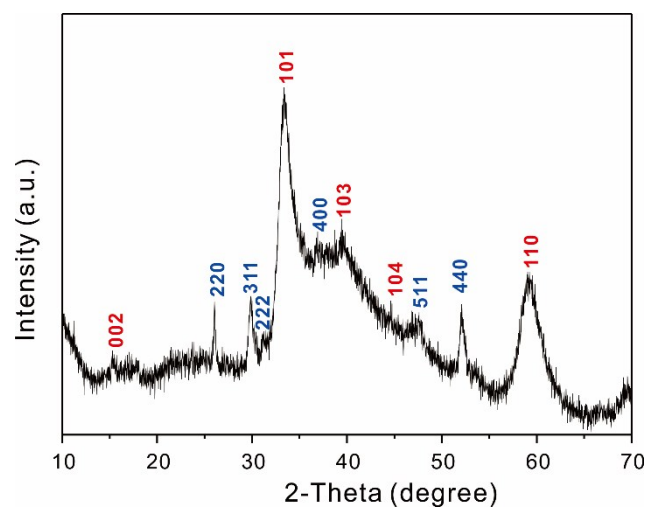

**Fig. S3** XRD pattern of MoS<sub>2</sub>/Co<sub>8</sub>S<sub>9</sub>/C nanoboxes.

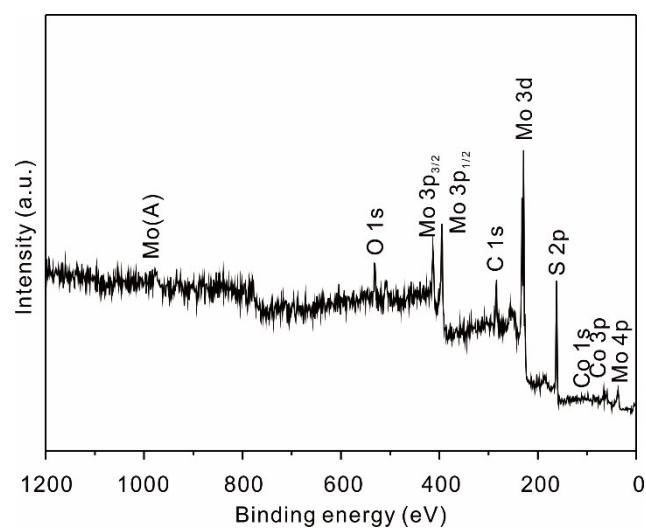

**Fig. S4** XPS spectrum of MoS<sub>2</sub>/Co<sub>8</sub>S<sub>9</sub>/C nanoboxes.

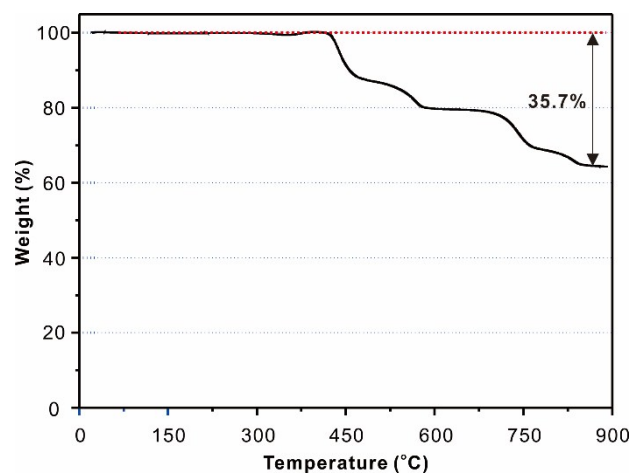

**Fig. S5** TG curve of MoS<sub>2</sub>/Co<sub>9</sub>S<sub>8</sub>/C nanoboxes.

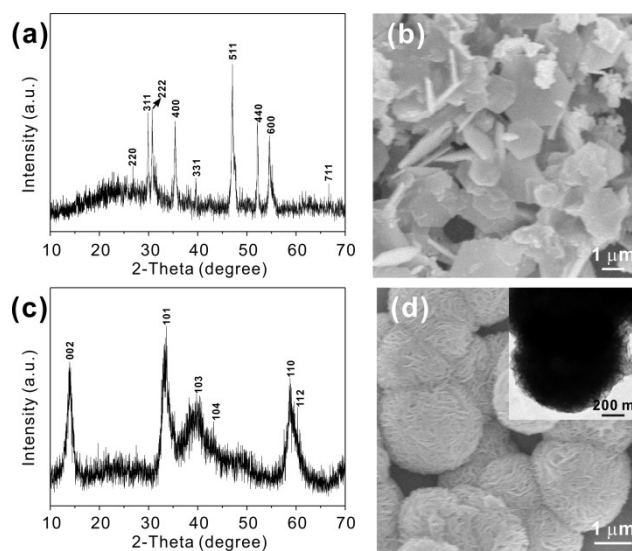

**Fig. S6** (a) XRD pattern and (b) SEM image of single-phased Co<sub>9</sub>S<sub>8</sub>; (c) XRD pattern and (d) SEM image of single-phased MoS<sub>2</sub>, inset in (d) is the TEM image of single-phased MoS<sub>2</sub>.

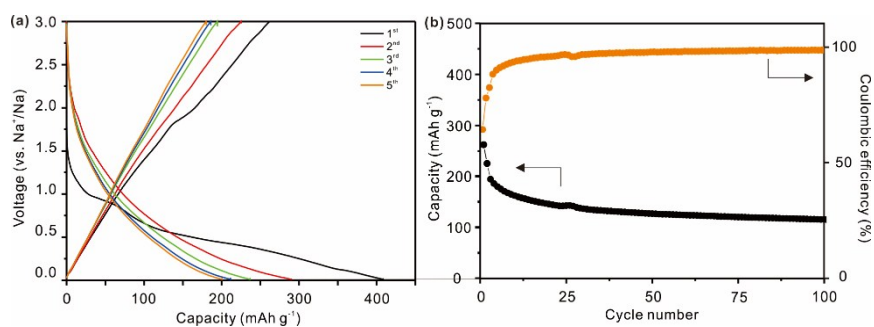

**Fig. S7** (a) Typical voltage profile, and (b) Cycling performance of carbon at a current density of 200 mA g<sup>-1</sup>.

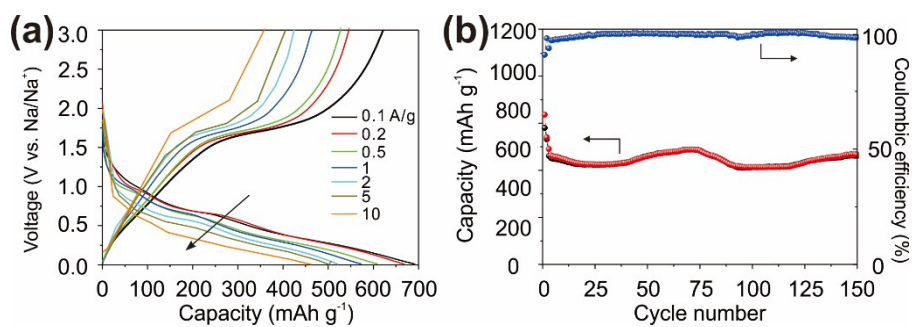

**Fig. S8** (a) Typical voltage profile of MoS<sub>2</sub>/Co<sub>8</sub>S<sub>9</sub>/C nanoboxes between 0.01 and 3.0 V at the rate from 0.1 to 10 A g<sup>-1</sup>; (b) Cycling performance of MoS<sub>2</sub>/Co<sub>8</sub>S<sub>9</sub>/C nanoboxes at a current density of 1 A g<sup>-1</sup>.

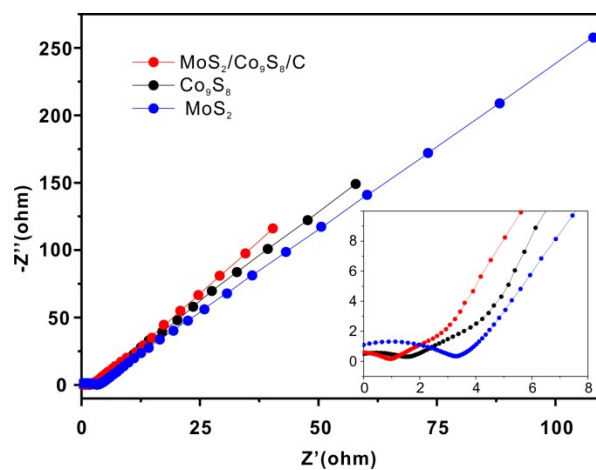

**Fig. S9** The Nyquist plots of single-phased  $\text{Co}_9\text{S}_8$ , single-phased  $\text{MoS}_2$  and  $\text{MoS}_2/\text{Co}_9\text{S}_8/\text{C}$  nanoboxes electrode before cycling.

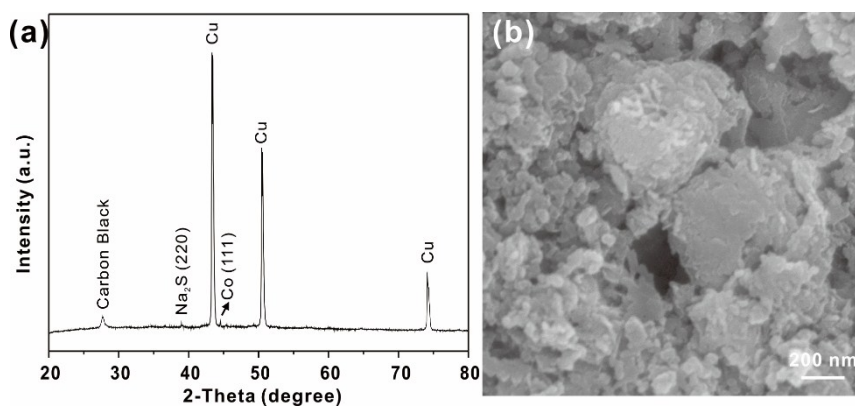

**Fig. S10** (a) *Ex situ* XRD patterns of the  $\text{MoS}_2/\text{Co}_9\text{S}_8/\text{C}$  nanoboxes after 1st discharge and (b) SEM image of the  $\text{MoS}_2/\text{Co}_9\text{S}_8/\text{C}$  nanoboxes after 100 cycles.

**Table S1.** Comparison of the electrochemical performance of MoS<sub>2</sub>/Co<sub>9</sub>S<sub>8</sub>/C nanobox with previously reported metal sulfides/mixed metal sulfides anode materials for NaIBs

| Materials                                                  | Current density<br>[mA g <sup>-1</sup> ] | Cycle     | Capacity[mAh g <sup>-1</sup> ] | Rate capability                                       | Reference               |
|------------------------------------------------------------|------------------------------------------|-----------|--------------------------------|-------------------------------------------------------|-------------------------|
| MoS <sub>2</sub> /C paper                                  | 80                                       | 100       | 286.0                          | 205 mAh g <sup>-1</sup> at<br>1000 mA g <sup>-1</sup> | [2]                     |
| MoS <sub>2</sub> nanosheets                                | 40                                       | 100       | 386                            | 251 mAh g <sup>-1</sup> at<br>320 mA g <sup>-1</sup>  | [3]                     |
| MoS <sub>2</sub> /C tube                                   | 250                                      | 200       | 480                            | 370 mAh g <sup>-1</sup> at<br>2500 mA g <sup>-1</sup> | [4]                     |
| MoS <sub>2</sub> /GR spheres                               | 200 (1500)                               | 50 (600)  | 480 (323)                      | 234 mAh g <sup>-1</sup> at<br>10 A g <sup>-1</sup>    | [5]                     |
| MoS <sub>2</sub> /GR                                       | 100 (1000)                               | 50 (500)  | 340 (300)                      | 230 mAh g <sup>-1</sup> at 5<br>A g <sup>-1</sup>     | [6]                     |
| Co <sub>9</sub> S <sub>8</sub> /C sphere                   | 500                                      | 50        | 404                            | 326 mAh g <sup>-1</sup> at<br>1.5 A g <sup>-1</sup>   | [7]                     |
| Co <sub>9</sub> S <sub>8</sub> /MWCNT                      | 500 (2000)                               | 80(80)    | 444 (373)                      | -                                                     | [8]                     |
| MoS <sub>2</sub> /TiO <sub>2</sub> nanowires               | 20                                       | 100       | 191                            | 48 mAh g <sup>-1</sup> at<br>4 A g <sup>-1</sup>      | [9]                     |
| MoS <sub>2</sub> /SnS nanocrystal                          | 500                                      | 100       | 455                            | 238 mAh g <sup>-1</sup> at<br>7 A g <sup>-1</sup>     | [10]                    |
| Ni <sub>3</sub> S <sub>2</sub> @MoS <sub>2</sub> nanofiber | 200 (5000)                               | 100 (400) | 602 (277)                      | 283 mAh g <sup>-1</sup> at<br>5 A g <sup>-1</sup>     | [11]                    |
| MoS <sub>2</sub> /Co <sub>9</sub> S <sub>8</sub> nanobox   | 500 (1000)                               | 100 (150) | 546 (461)                      | 222 mAh g <sup>-1</sup> at<br>10 A g <sup>-1</sup>    | <b>Current<br/>work</b> |

## References

1. Z. Jiang, W. Lu, Z. Li, K. H. Ho, X. Li, X. Jiao, D. Chen, *J. Mater. Chem. A*, **2014**, 2, 8603-8606.
2. X. Xie, T. Makaryan, M. Zhao, K. L. Van Aken, Y. Gogotsi, G. Wang, *Adv. Energy Mater.* **2016**, 6, 1502161.
3. D. Su, S. Dou, G. Wang, *Adv. Energy Mater.* **2015**, 5, 1401205.
4. X. Zhang, X. Li, J. Liang, Y. Zhu, Y. Qian, *Small* **2016**, 12, 2484-2491.
5. S. H. Choi, Y. N. Ko, J.-K. Lee, Y. C. Kang, *Adv. Funct. Mater.* **2015**, 25, 1780-1788.
6. S. Kalluri, K. H. Seng, Z. Guo, A. Du, K. Konstantinov, H. K. Liu, S. X. Dou, *Sci. Rep.* **2015**, 5, 11989.
7. Y. N. Ko, Y. C. Kang, *Carbon* **2015**, 94, 85-90.
8. H. Zhou, J. Hu, *Mater. Lett.* **2017**, 195, 26-30.
9. J.-Y. Liao, B. D. Luna, A. Manthiram, *J. Mater. Chem. A* **2016**, 4, 801-806.
10. S. H. Choi, Y. C. Kang, *ACS Appl. Mater. Interfaces* **2015**, 7, 24694-26702.
11. J. Wang, J. Liu, H. Yang, D. Chao, J. Yan, S. V. Savilov, J. Lin, Z. X. Shen, *Nano Energy* **2016**, 20, 1-10.
